# Supplementary material for: Mapping quantitative trait loci for heat tolerance at anthesis in rice using chromosomal segment substitution lines
Source: PubMed Central journal article supplement — Breed Sci. 2016 May 20;66(3):358–66. doi: 10.1270/jsbbs.15084 (PMC4902453; doi:10.1270/jsbbs.15084), 2016-05-20
Supplement: 66_15084_2.pdf [file 66_15084_2.pdf]

**Supplemental Table 1.** Correlation coefficients for spikelet fertility under high temperature in 2013, 2014/8/6 and 2014/8/7

| Trait  | SSP8.6  | SSP8.7  |
|--------|---------|---------|
| SSP8.7 | 0.673** |         |
| SSP13  | 0.435** | 0.411** |

\* and \*\* mean the significance levels of 0.05 and 0.01, respectively; SSP8.6, SSP8.7, SSP13 mean spikelet fertility in 2014-8-6, 2014-8-7 and 2013, respectively

**Supplemental Table 2.** Published QTLs associated with heat tolerance at flowering stage which were overlapped with QTLs identified in our research

| QTL                               | Chr.      | Marker               | Position(Mb)     | LOD  | Additive effect | R <sup>2</sup> (%) | Population                    | Donor       | Reference                      |
|-----------------------------------|-----------|----------------------|------------------|------|-----------------|--------------------|-------------------------------|-------------|--------------------------------|
| <b><i>qSF<sup>ht</sup>2</i></b>   | <b>2</b>  | <b>RM1234-RM3850</b> | <b>11.3-35.4</b> |      |                 |                    |                               |             |                                |
| <i>qtl2.2</i>                     |           | C601                 | 30.3             | 3.7  | 0.11            | 7.4                | Bala×Azucena RIL              | Azucena     | (Jagadish <i>et al.</i> 2010a) |
| <i>qHt2</i>                       |           | RM183-RM106          | 25.1             | 5.2  | -4.87           | 7.4                | T219×T226 RIL                 | T226        | (Chen <i>et al.</i> 2008)      |
| <i>qh<sub>ts</sub>-2</i>          |           | RM406-525            | 28.3-35.2        | 2.7  | -0.38           | 6.6                | Zhongyouzao 8×Toyonishiki RIL | Toyonishiki | (Zhang <i>et al.</i> 2008)     |
| <b><i>qSF<sup>ht</sup>4.2</i></b> | <b>4</b>  | <b>RM3916-RM2431</b> | <b>28.6-34.9</b> |      |                 |                    |                               |             |                                |
| <i>qhr4-3</i>                     |           | RG214-RG143          | 31.7-33.7        | 6.4  | 4.33            | 1.3                | IR64×Azucena DH               | IR64        | (Cao <i>et al.</i> 2003)       |
| <b><i>qPSL<sup>ht</sup>5</i></b>  | <b>5</b>  | <b>RM1248-RM4915</b> | <b>0-4.3</b>     |      |                 |                    |                               |             |                                |
| <i>qh<sub>ts</sub>-5</i>          |           | RM405-274            | 3.1-26.9         | 4.6  | 0.66            | 10.7               | Zhongyouzao 8×Toyonishiki RIL | ZYZ8        | (Zhang <i>et al.</i> 2008)     |
| <b><i>qDFT3</i></b>               | <b>3</b>  | <b>RM3766-RM3513</b> | <b>6.9-25.1</b>  |      |                 |                    |                               |             |                                |
| <i>qhr3-1</i>                     |           | RZ892-RG100          | 5.2-12.9         | 6.4  | -6.46           | 2.9                | IR64×Azucena DH               | Azucena     | (Cao <i>et al.</i> 2003)       |
| <i>qh<sub>ts</sub>-3</i>          |           | RM157b-282           | 12.41            | 2.7  | -0.60           | 10.7               | Zhongyouzao 8×Toyonishiki RIL | Toyonishiki | (Zhang <i>et al.</i> 2008)     |
| <b><i>qDFT8</i></b>               | <b>8</b>  | <b>RM5891-RM4997</b> | <b>26.6-28.2</b> |      |                 |                    |                               |             |                                |
| <i>qtl8.3</i>                     |           | RG598                | 27.6             | 3.4  | -0.11           | 7.4                | Bala×Azucena RIL              | Bala        | (Jagadish <i>et al.</i> 2010a) |
| <b><i>qDFT10.1</i></b>            | <b>10</b> | <b>RM6737-RM6673</b> | <b>18.7-23.0</b> |      |                 |                    |                               |             |                                |
| <i>qtl10.1</i>                    |           | C16                  | 20.8             | 3.6  | -0.146          | 13.0               | Bala×Azucena RIL              | Bala        | (Jagadish <i>et al.</i> 2010a) |
|                                   |           |                      |                  | 3.5  | -0.226          | 13.4               |                               |             |                                |
| <i>SSPF10</i>                     |           | RM6132-RM6100        | 18.8-18.9        | 6.6  | 7.24            | 11.5               | 996×4628 RIL                  | 996         | (Xiao <i>et al.</i> 2011)      |
| <i>SSPc10</i>                     |           |                      |                  | 7.2  | 6.99            | 11.6               |                               |             |                                |
| <b><i>qDFT11</i></b>              | <b>11</b> | <b>RM1355-RM2191</b> | <b>17.2-24.7</b> |      |                 |                    |                               |             |                                |
| <i>qtl11.1</i>                    |           | G1465                | 24.2             | 3.2  | 0.15            | 8.0                | Bala×Azucena RIL              | Azucena     | (Jagadish <i>et al.</i> 2010a) |
|                                   |           |                      |                  | 2.8  | 0.14            | 7.4                |                               |             |                                |
| <b><i>qPSL<sup>ht</sup>1</i></b>  | <b>1</b>  | <b>RM1196-RM6581</b> | <b>21.9-31.5</b> |      |                 |                    |                               |             |                                |
| <i>qhr1</i>                       |           | RG381-RZ19           | 30.9             | 10.2 | -9.5            | 19.2               | IR64×Azucena DH               | Azucena     | (Cao <i>et al.</i> 2003)       |

Bold words represent QTLs identified in this study
